# Supplementary material
Source: Springer Nature journal article supplement (https://mijn.bsl.nl/resource/supplementary/13047_2009_116_MOESM6_ESM.pdf/7110100)

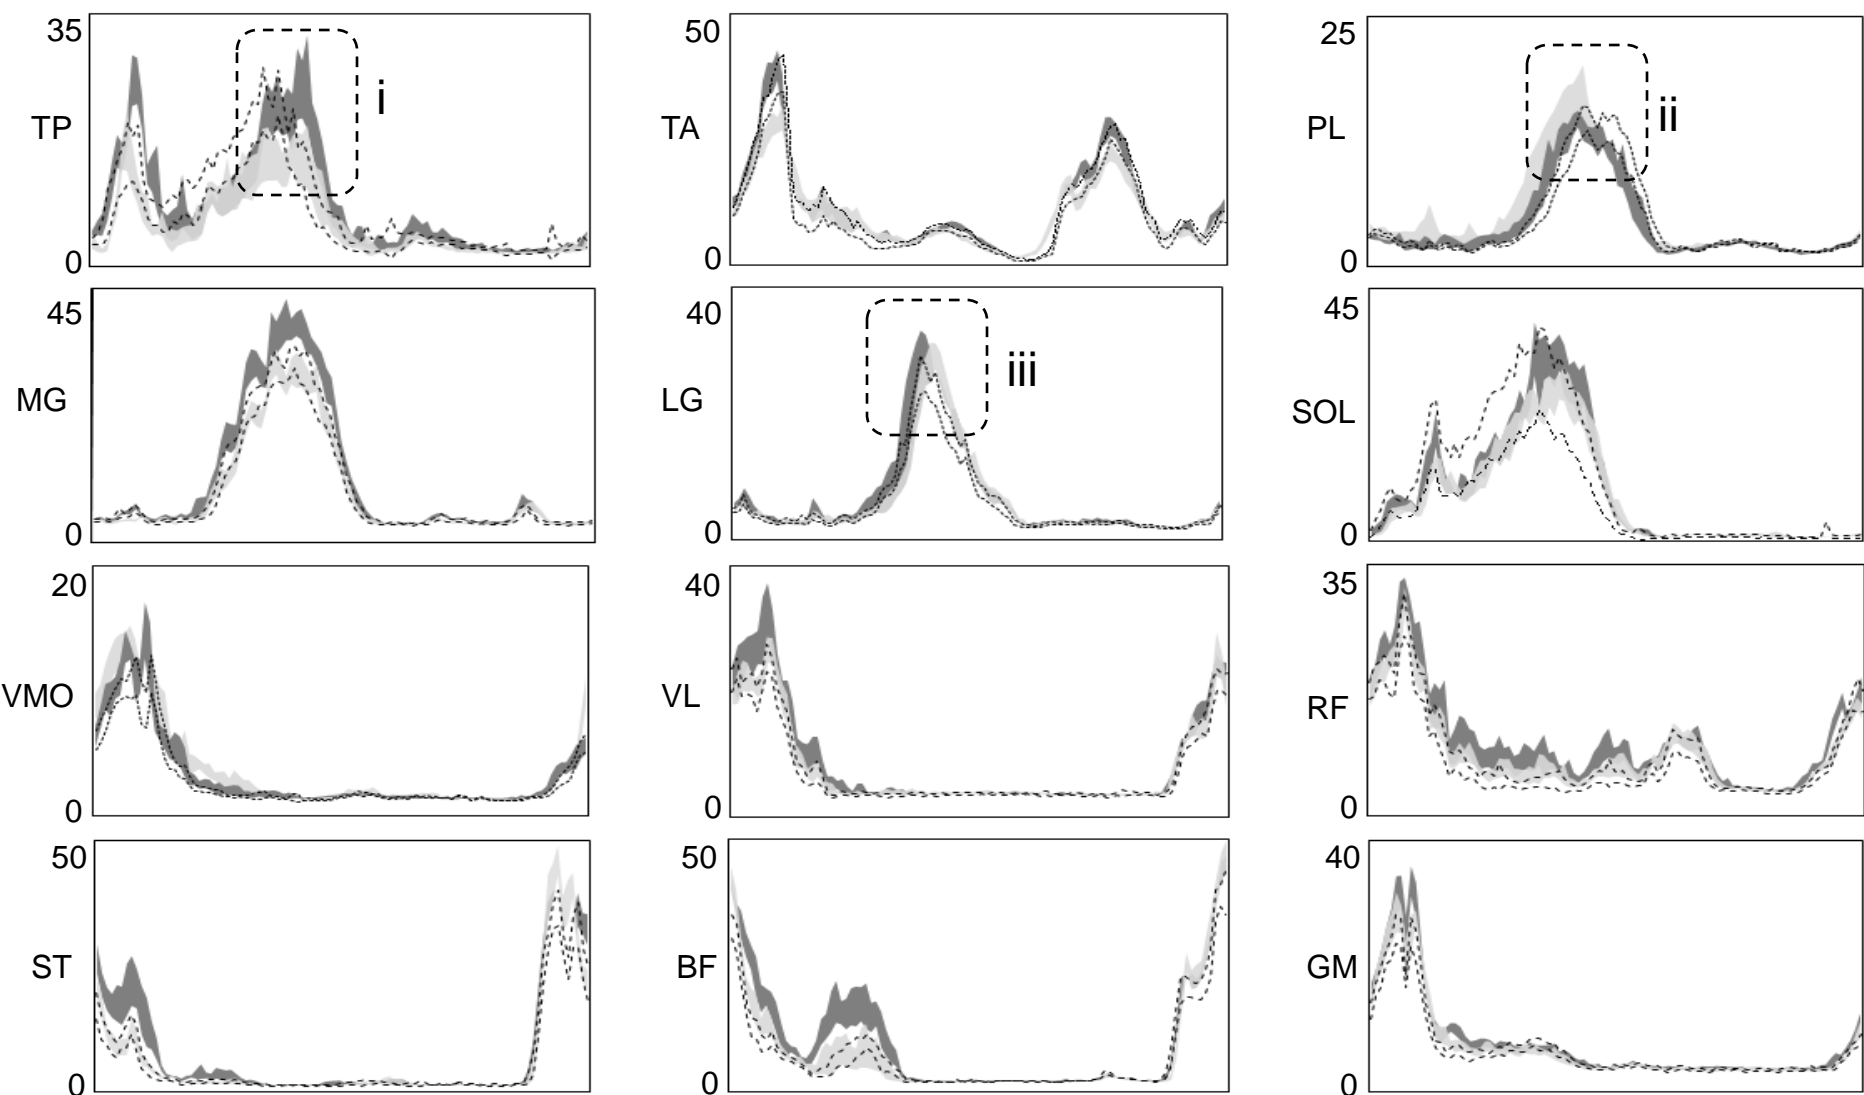

**i**

← Pre-tape peak

← Tape peak

= Reduced TP peak activity with tape

**ii**

← Tape peak

← Pre-tape peak

= Increased PL peak activity with tape

**iii**

Pre-tape time to peak

Tape time to peak

= Delayed time to peak LG activity with tape

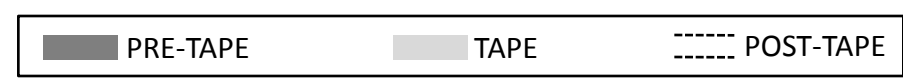

Supplement: MOESM6 [file 7110100]
